# Supplementary material for: Biodegradable magnesium implant enhances angiogenesis and alleviates medication-related osteonecrosis of the jaw in rats
Source: PubMed Central journal article supplement — J Orthop Translat. 2022 Mar 28;33:153–61. doi: 10.1016/j.jot.2022.03.004 (PMC8965768; doi:10.1016/j.jot.2022.03.004), 2022-03-28
Supplement: mmc2.pdf [file mmc2.pdf]

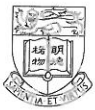

November 30, 2018

Dr Y SU  
Faculty of Dentistry

Dear Dr Su,

**CULATR 4835-18**

I write to inform you that the Committee on the Use of Live Animals in Teaching and Research has approved, after due consideration, your research protocol entitled "The effects of implant-derived magnesium on the bone healing in medication-related osteonecrosis of the jaw".

Your attention is drawn to the following:

- i) Approval of the above research protocol has an **approval validity period of three years from the date of issuance of this letter**. If this research protocol commences after the validity period, you are required to submit a new application to the Committee for approval before commencement of the experiments.
- ii) The project **must only be carried out by person(s) holding valid Cap. 340 license(s) issued by the Department of Health**.
- iii) If the duration of your animal experiment extends beyond three years from the commencement date, you are required to seek the Committee's approval by providing the anticipated completion date and detailed justifications before the approval period expires.
- iv) Application for "amendments" to approved protocols will only be accepted subject to the following conditions:
  1. less than 10 percent increase in the number of animals of the approved strain/species;
  2. changes in staff/students involved in the experimental procedures only;
  3. changes in the project title;
  4. minor changes to experimental / animal handling procedures that do not cause serious implications to the welfare of animals; and/or
  5. extension of project duration and approval validity period up to 1 year.

Should your approved protocol involve changes outside the above criteria, you will be required to make a new submission.

- v) You are **required to submit an annual report** to the CULATR listing the type/number of animals used in the approved project and indicating whether [i] the approved project has commenced or was completed, [ii] there has been or will be any changes in the approved protocol, and [iii] there has been any unexpected animal sufferings observed during the specified reporting period.

Yours sincerely,

Professor YS Chan  
Chairman  
Committee on the Use of Live Animals  
in Teaching and Research

YSC/KL/al
